# Supplementary material for: Highly stereoselective reduction of prochiral ketones by a bacterial reductase coupled with cofactor regeneration
Source: Royal Society of Chemistry journal article supplement (doi:10.1039/c1ob05285c), 2011-01-01
Supplement: c1ob05285c.pdf [file c1ob05285c.pdf]

## Supplementary Material

The enantiomeric purity of (*R*)-**1b** was determined by chiral GC analysis after acetylation. GC: CP-Chirasil-DEX CB (Varian, USA,  $\phi$  0.25 mm  $\times$  25 m), Inj. and Det. 280°C, Col. 110°C for 2 min, 2°C min<sup>-1</sup> to 126°C for 2 min, 5°C min<sup>-1</sup> to 160°C, (*R*) 13.03 min, (*S*) 13.44 min.

The optical rotation of (*R*)-**1b** was  $[\alpha]_{\text{D}}^{25}$ : +22.3 (*c* 5.0, CHCl<sub>3</sub>), 99.6% ee, (*R*) {lit.<sup>1</sup>  $[\alpha]_{\text{D}}^{25}$ : +20.1 (*c* 8.24, CHCl<sub>3</sub>), 96% ee, (*R*)}.

The product, (*R*)-**1b**, gave the following NMR, MS and IR data:

<sup>1</sup>H NMR (500 MHz, CDCl<sub>3</sub>):  $\delta$  1.29 (t, 3H, *J*=7.1 Hz), 2.59–2.67 (m, 2H), 3.20 (br s, 1H), 3.59–3.64 (m, 2H), 4.19 (q, 2H, *J*=7.1 Hz), 4.24–4.29 (m, 1H).

<sup>13</sup>C NMR (100 MHz, CDCl<sub>3</sub>):  $\delta$  14.1, 38.6, 48.2, 60.5, 67.9, 171.8.

MS (*m/z*): M<sup>+</sup> 167, 123, 121, 117, 89, 85, 79, 71, 60, 43.

IR (KBr): 3452.5, 2983.5, 2909.1, 1729.5, 1375.6, 1306.4, 1259.6, 1189.4, 1093.1, 1032.7 cm<sup>-1</sup>.
